# Supplementary material for: Dissolution of the zeolites NaA, potassium exchanged zeolite (KA) and the amorphous and crystalline phases obtained by thermal treatment of zeolite KA in hot alkaline solution
Source: Royal Society of Chemistry journal article supplement (doi:10.1039/b002807j), 2000-01-01
Supplement: tables.doc [file tables.doc]

Table 1 Changes in the molar concentrations (*C*Al)L of aluminium, (*C*Si)L of silicon and their ratios (*C*Si/*C*Al)L in the liquid phase as well as amounts (in mol/kg) (*C*Al)s of aluminium, (*C*Si)s of silicon, and their ratios (*C*Si/*C*Al)s in the solid phase during dissolution of the solid NaA (sodium form of zeolite A) in 2 M NaOH solution at 70 C. *t*d is time of dissolution.

| *t*d (*C*Si)L (*C*Al)L (*C*Si/*C*Al)L (*C*Si)S (*C*Al)S (*C*Si/*C*Al)S  (min) (mol/dm-3) (mol/dm-3) (mol/kg) (mol/kg) |
| --- |
| 1 0.0015 0.0016 0.937 5.335 5.326 1.002 |
| 3 0.0029 0.0028 1.028 5.389 5.338 1.010 |
| 4 0.0031 0.0032 0.968 5.383 5.350 1.006 |
| 6 0.0036 0.0039 0.933 5.385 5.357 1.005 |
| 8 0.0050 0.0051 0.972 5.386 5.367 1.004 |
| 11 0.0053 0.0056 0.953 5.386 5.395 0.988 |
| 14 0.0070 0.0069 1.014 5.378 5.406 0.995 |
| 20 0.0096 0.0089 1.083 ------- ------- ------- |
| 30 0.0098 0.0097 1.010 5.390 5.423 0.994 |
| 45 0.0110 0.0112 0.982 5.400 5.422 0.996 |
| 60 0.0126 0.0124 1.016 5.410 5.429 0.996 |
| 90 0.0139 0.0135 1.030 5.410 5.420 0.998 |
| 120 0.0147 0.0143 1.030 5.420 5.436 0.997 |
| 180 0.0177 0.0167 1.060 ------- ------- ------- |

Table 2 Changes in the molar concentrations (*C*Al)L of aluminium, (*C*Si)L of silicon and their ratios (*C*Si/*C*Al)L in the liquid phase as well as amounts (in mol/kg) (*C*Al)s of aluminium, (*C*Si)s of silicon, and their ratios (*C*Si/*C*Al)s in the solid phase during dissolution of the solid KA (potassium-exchanged zeolite A) in 2 M NaOH solution at 70 C. *t*d is time of dissolution.

| *t*d  (*C*Si)L (*C*Al)L (*C*Si/*C*Al)L (*C*Si)S (*C*Al)S (*C*Si/*C*Al)S  (min) (mol/dm-3) (mol/dm-3) (mol/kg) (mol/kg) |
| --- |
| 1 0.00449 0.00468 0.960 5.099 5.115 0.997 |
| 3 0.00479 0.00478 1.002 5.085 5.107 0.996 |
| 5 0.00718 0.00674 1.065 5.090 5.100 0.996 |
| 8 0.00715 0.00704 1.011 5.100 5.116 0.997 |
| 10 0.00802 0.00810 0.990 5.110 5.117 0.999 |
| 15 0.00859 0.00870 0.997 5.135 5.119 1.003 |
| 20 0.00979 0.00950 1.030 5.134 5.121 1.002 |
| 25 0.01059 0.01028 1.030 ------- ------- ------ |
| 30 0.01086 0.01090 1.000 ------- ------- ------ |
| 45 0.01311 0.01350 0.970 5.140 5.127 1.002 |
| 60 0.01623 0.01530 1.060 5.139 5.126 1.002 |
| 90 0.02360 0.02340 1.000 5.142 5.129 1.002 |
| 120 0.02740 0.02710 1.010 5.140 5.127 1.002 |

Table 3 Changes in the molar concentrations (*C*Al)L of aluminium, (*C*Si)L of silicon and (*C*K)L of potassium and their ratios (*C*Si/*C*Al)L and (*C*K/*C*Al)Lin the liquid phase as well as amounts (in mol/kg) (*C*Al)s of aluminium, (*C*Si)s of silicon, and (*C*K)s and their ratios (*C*Si/*C*Al)s and (*C*K/*C*Al)s in the solid phase during dissolution of the solid K-as (amorphous aluminosilicate obtained by heating of the solid KA at 762 C for 30 min) in 2 M NaOH solution at 70 C. *t*d is time of dissolution.

| *t*d (*C*Si )L (*C*Al)L (*C*K)L (*C*Si/*C*Al)L (*C*K/*C*Al)L (*C*Si )S (*C*Al)S (*C*K)S (*C*Si/*C*Al)S (*C*K/*C*Al)S  (min) (mol/dm-3) (mol/dm-3) (mol/dm-3) (mol/kg) (mol/kg) (mol/kg) |
| --- |
| 1 0.00798 0.00715 --------- 1.116 ------ 6.162 6.240 5.900 0.988 0.946 |
| 3 0.01078 0.0118 0.0105 0.913 0.890 6.127 6.239 6.020 0.987 0.965 |
| 5 0.01279 0.0141 0.0126 0.907 0.894 6.157 6.242 5.900 0.986 0.945 |
| 10 0.01973 0.0195 0.0171 1.012 0.877 6.159 6.244 5.900 0.986 0.945 |
| 15 0.02470 0.0227 0.0236 1.088 1.040 6.162 6.244 6.144 0.987 0.984 |
| 20 0.02710 0.0279 0.0287 0.970 1.030 6.165 6.247 5.900 0.987 0.944 |
| 25 0.0289 0.0297 0.0290 0.973 0.976 6.166 6.247 5.900 0.987 0.944 |
| 30 0.0314 0.0317 0.0310 0.991 0.979 6.168 6.249 6.020 0.987 0.963 |
| 45 0.0388 0.0389 0.0366 0.997 0.941 6.171 6.254 6.144 0.987 0.982 |
| 60 0.0437 0.0428 0.0434 1.021 1.014 6.170 6.251 6.020 0.987 0.963 |
| 90 0.0549 0.0557 0.0535 0.986 0.960 6.172 6.257 6.144 0.986 0.982 |
| 120 0.0662 0.0680 0.0907 0.974 1.334 6.175 6.258 6.020 0.987 0.962 |
| 195 0.1040 0.1060 0.2020 0.981 1.906 --- --- --- --- --- |

Table 4 Changes in the molar concentrations (*C*Al)L of aluminium, (*C*Si)L of silicon and (*C*K)L and their ratios (*C*Si/*C*Al)L and (*C*K/*C*Al)L, in the liquid phase as well as amounts (in mol/kg) (*C*Al)s of aluminium, (*C*Si)s of silicon, and (*C*K)s and their ratios (*C*Si/*C*Al )L and (*C*K/*C*Al)L, in the solid phase during dissolution of the solid kk (a mixture of kalsilite and kaliophilite obtained by heating of the solid KA at 762 C for 180 min) in 2 M NaOH solution at 70 C. *t*d is time of dissolution.

| *t*d (*C*Si )L (*C*Al)L (*C*K)L (*C*Si/*C*Al)L (*C*K/*C*Al)L (*C*Si )S (*C*Al)S (*C*K)S (*C*Si/*C*Al)S (*C*K/*C*Al)S  (min) (mol/dm-3) (mol/dm-3) (mol/dm-3) (mol/kg) (mol/kg) (mol/kg) |
| --- |
| 1 0.00580 0.00612 -------- 0.948 ------- 6.279 6.183 5.636 1.016 0.912 |
| 3 0.00790 0.00700 0.00691 1.129 0.987 6.285 6.185 5.871 1.016 0.949 |
| 5 0.01160 0.01203 0.01012 0.963 0.841 6.280 6.187 6.106 1.015 0.987 |
| 8 0.01442 0.01410 0.01250 1.023 0.887 6.286 6.181 6.106 1.015 0.988 |
| 10 0.01648 0.01589 0.01427 1.037 0.898 6.288 6.192 6.106 1.016 0.986 |
| 20 0.02378 0.02304 0.02060 1.032 0.894 6.285 6.192 5.753 1.015 0.929 |
| 30 0.02825 0.02686 0.02660 1.052 0.990 6.288 6.185 5.753 1.017 0.930 |
| 45 0.03196 0.03328 0.03270 0.960 0.983 6.287 6.180 5.988 1.017 0.969 |
| 60 0.03827 0.03879 0.04140 0.987 1.067 --- --- --- --- --- |
| 90 0.05662 0.05475 0.04620 1.034 0.844 6.288 6.182 5.871 1.017 0.950 |
| 120 0.0682 0.06750 0.07460 1.010 1.105 6.290 6.186 5.988 1.017 0.968 |
| 180 --- --- --- --- 6.288 6.189 5.988 1.016 0.968 |
